# Supplementary material
Source: MDPI journal article supplement (https://www.mdpi.com/1424-8247/16/4/505)
Supplement: s1 [file s1]

Archive with 1 entries (1 files):
- pharmaceuticals-2166719-supplementary.pdf
