# Supplementary material
Source: MDPI journal article supplement (https://www.mdpi.com/1424-8247/16/4/505)
Supplement: s1 [file s1 › pharmaceuticals-2166719-supplementary.pdf]

*Supplementary information*

**Controlled drug delivery device for cornea treatment and novel method for its testing**

<sup>1</sup>\*Pavel Urbánek, <sup>1</sup>Pavol Šuly, <sup>1</sup>Jakub Ševčík, <sup>1</sup>Barbora Hanulíková, <sup>1</sup>Ivo Kuřitka, <sup>1</sup>Tomáš Šopík, <sup>2</sup>Pavel Stodůlka

<sup>1</sup>Centre of Polymer Systems, Tomas Bata University in Zlín, trida Tomase Bati 5678, Zlin 76001, Czech Republic

<sup>2</sup>Gemini Eye Clinic, U Gemini 360, 760 01 Zlin – Priluky, Czech Republic

\*Corresponding author: [urbanek@utb.cz](mailto:urbanek@utb.cz)

**Detailed dimensions of constructed holder**

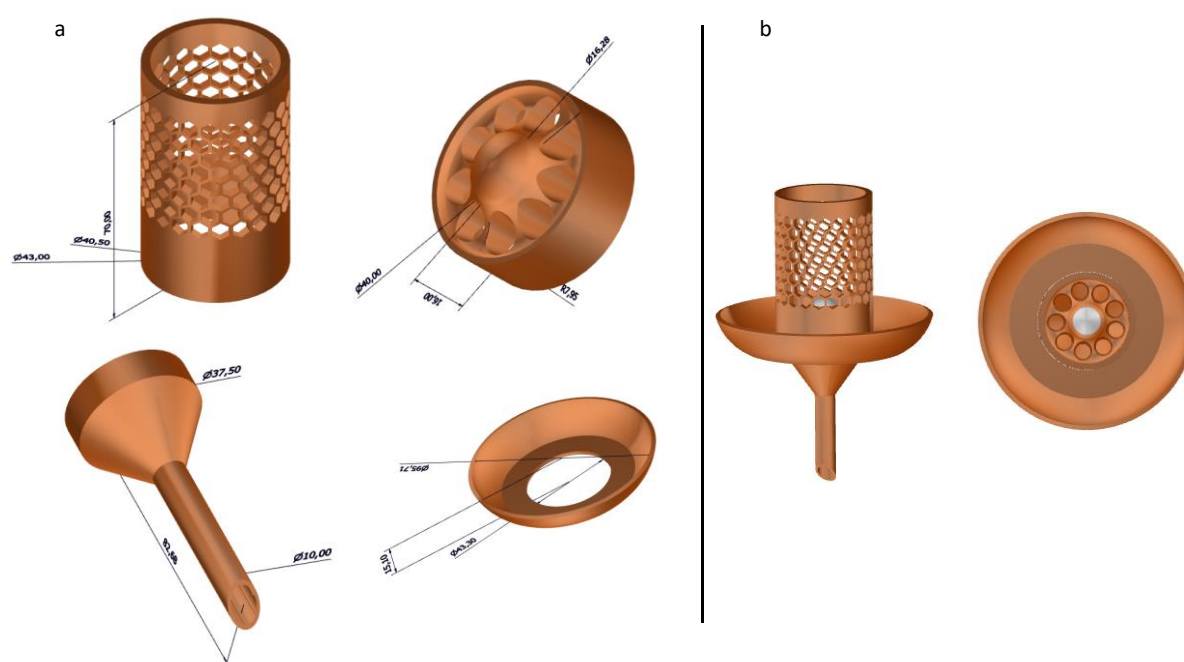

*Figure S1 The cornea holder prepared using 3D printer – a) its individual parts with dimensions, b) individual parts assembled together.*

### UV-Vis characterization

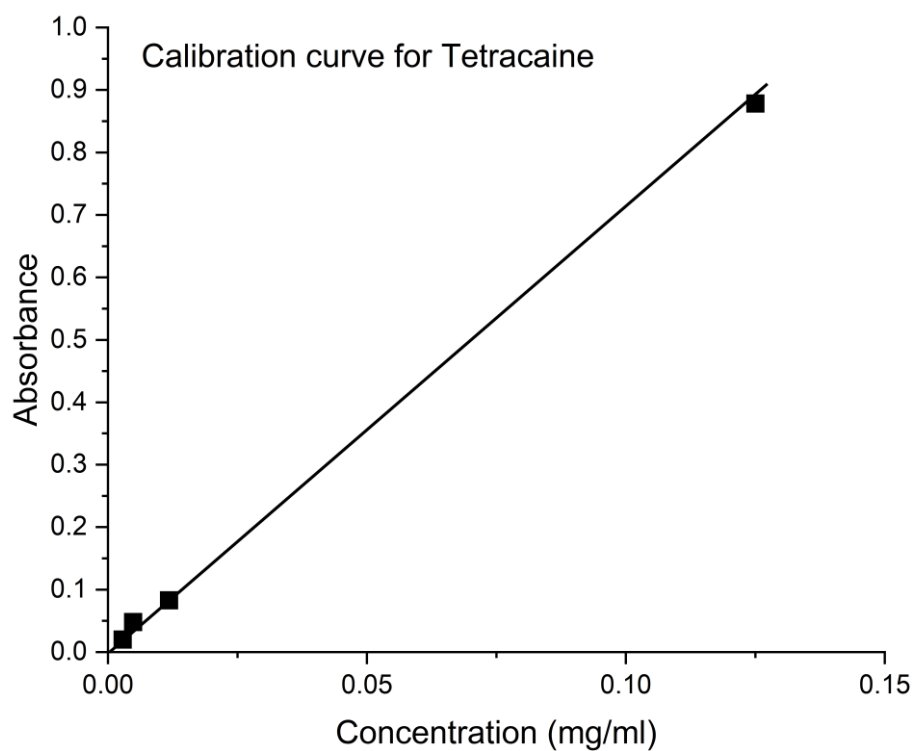

Figure S2 Calibration curve of Tetracaine, measured in the maximum of absorption peak at 310 nm.

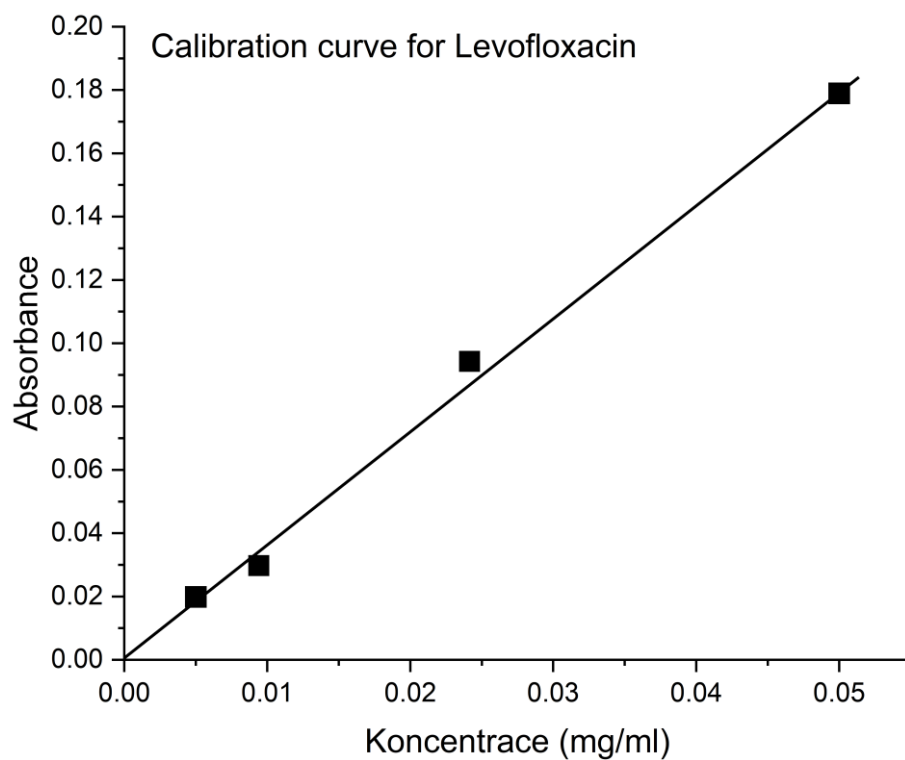

Figure S3 Calibration curve of Levofloxacin, measured in the maximum of absorption peak at 287 nm.

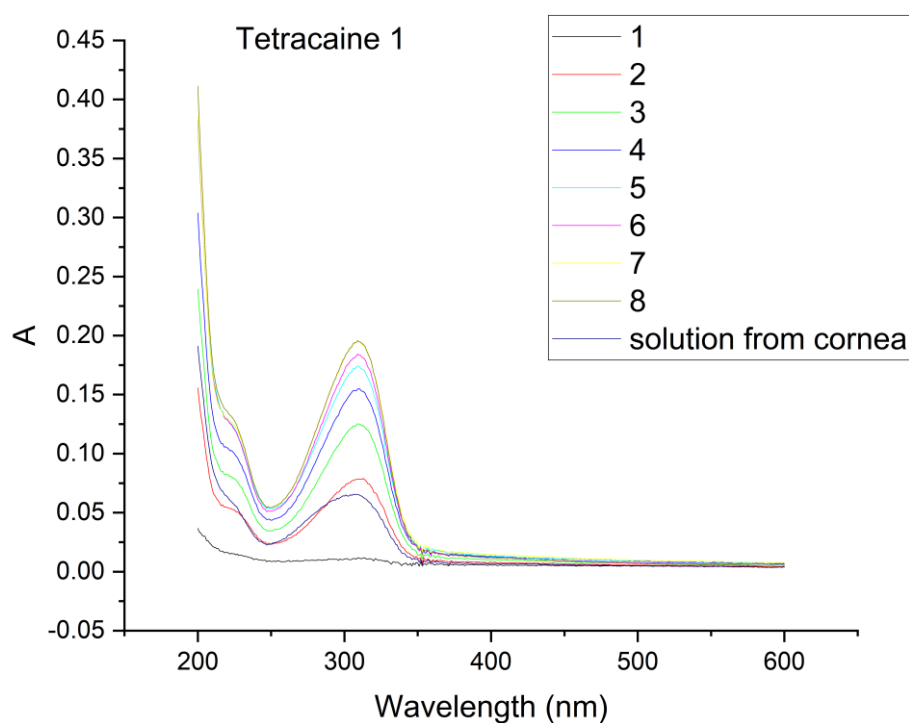

Figure S4 Representative Tetracaine absorption spectra achieved during the release experiment.

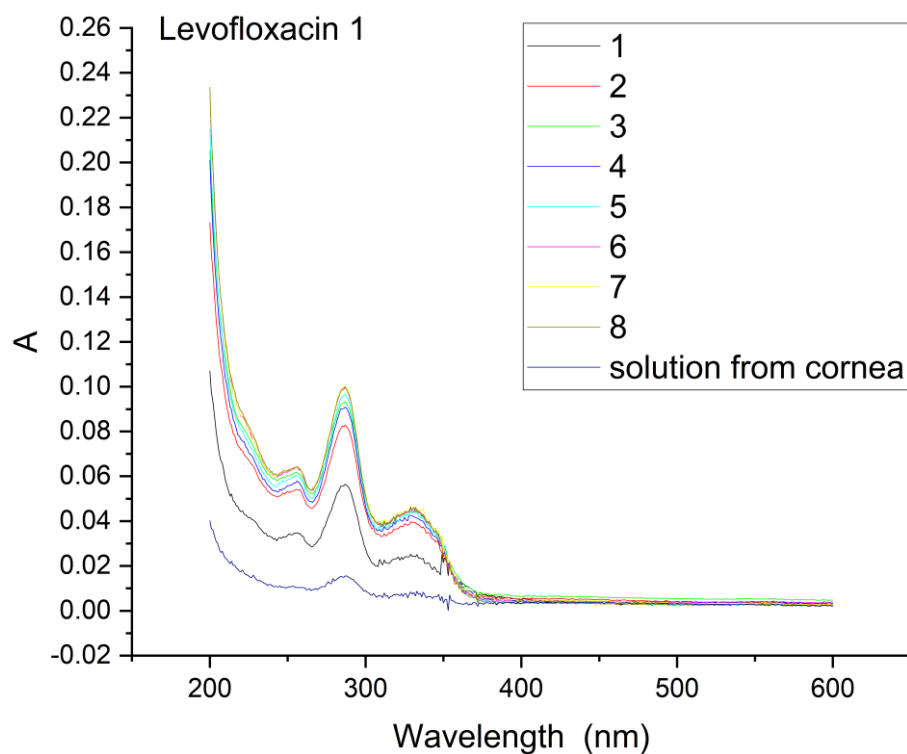

Figure S5 Representative Levofloxacin absorption spectra achieved during the release experiment.

### Detection limit of UV-Vis spectrometry

Peak-to-peak value represents a value of signal noise in which the lowest noise peak is subtracted from the highest noise peak. This subtraction indicates the maximum amount of noise that could interfere the signal of the analyte in the spectrum. For the region between 307 and 312 nm, where Tetracaine has an absorption band, the peak-to-peak value is 0.00178201, for the region 284–291 nm, where Levofloxacin has the absorption maximum, the peak-to-peak value is 0.00064517. From the measurements for the

calibration curves, it follows that the absorbance of the solution with a concentration of 1  $\mu\text{g/ml}$  is about 0.007 for Tetracaine and 0.0036 for Levofloxacin. It can therefore be stated that the detection limit of the method is at least 1  $\mu\text{g/ml}$ .

Table S1 Detection limits.

| Region [nm] | Peak-to-Peak |              | Absorption of solution with concentration 1 $\mu\text{g/ml}$ |
|-------------|--------------|--------------|--------------------------------------------------------------|
| 307–312     | 0.00178201   | Tetracaine   | 0.007026                                                     |
| 284–291     | 0.00064517   | Levofloxacin | 0.003578                                                     |

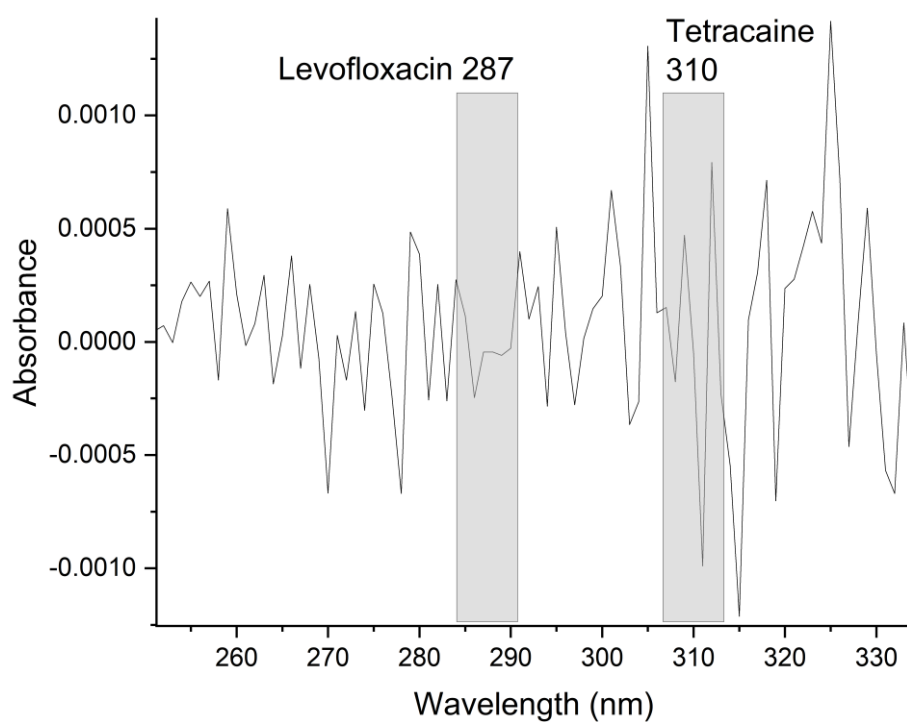

Figure S6 Baseline shown in areas of interest for drugs detection with marked absorption maxima for both API.

## Kinetic models of released API

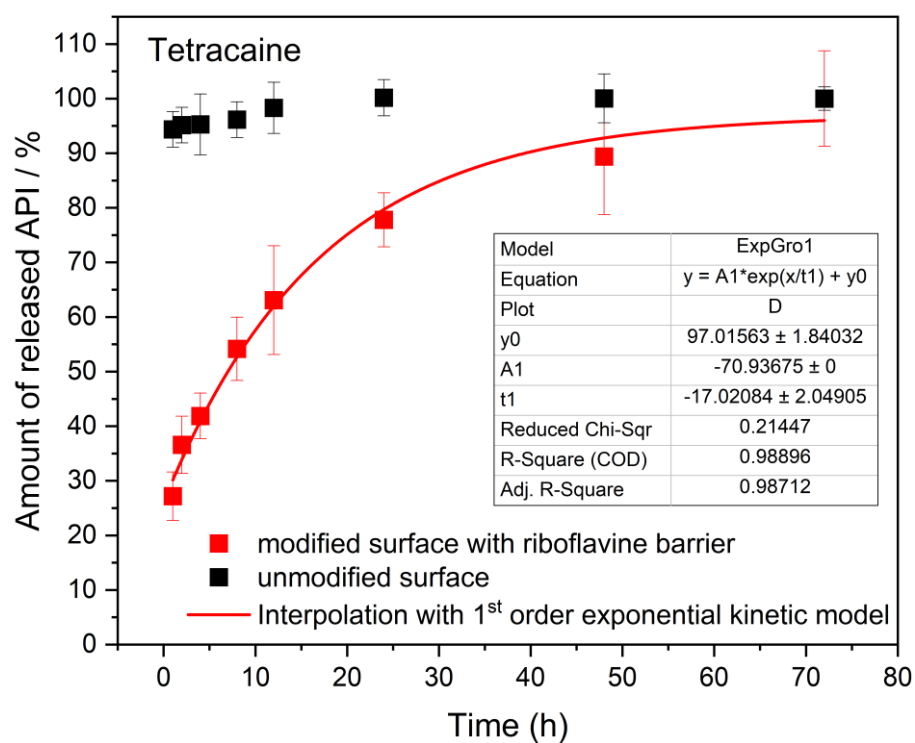

Figure S7 Tetracaine release profiles from unmodified (black) and surface-crosslinked (red) collagen drug carriers with kinetic model and its parameters.

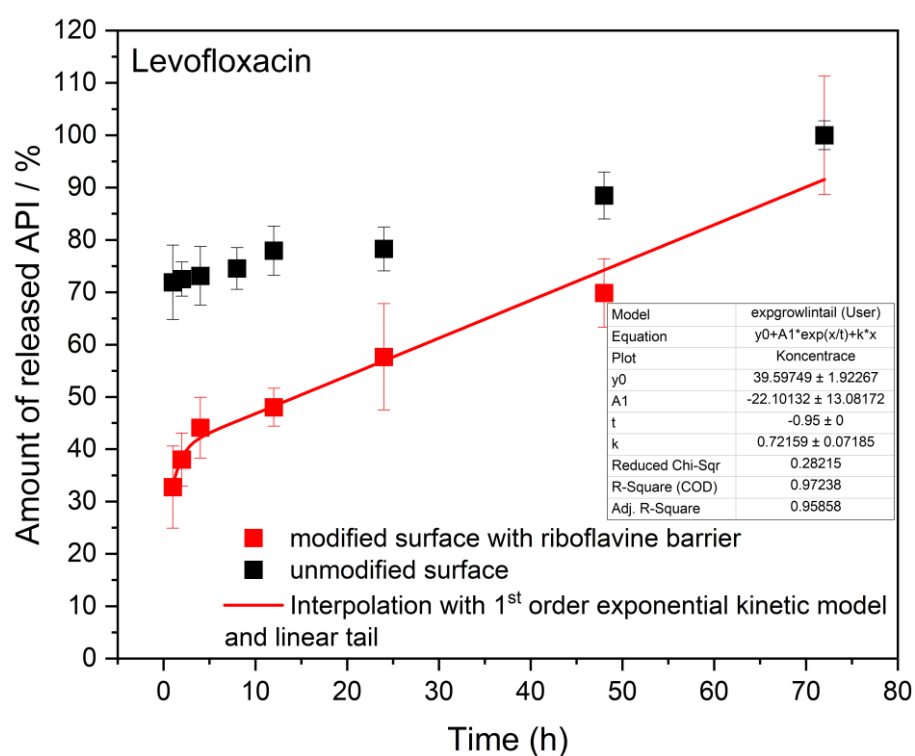

Figure S8 Levofloxacin release profiles from unmodified (black) and surface-crosslinked (red) collagen drug carriers with kinetic model and its parameters.

## HPLC analysis of API and API released from carrier

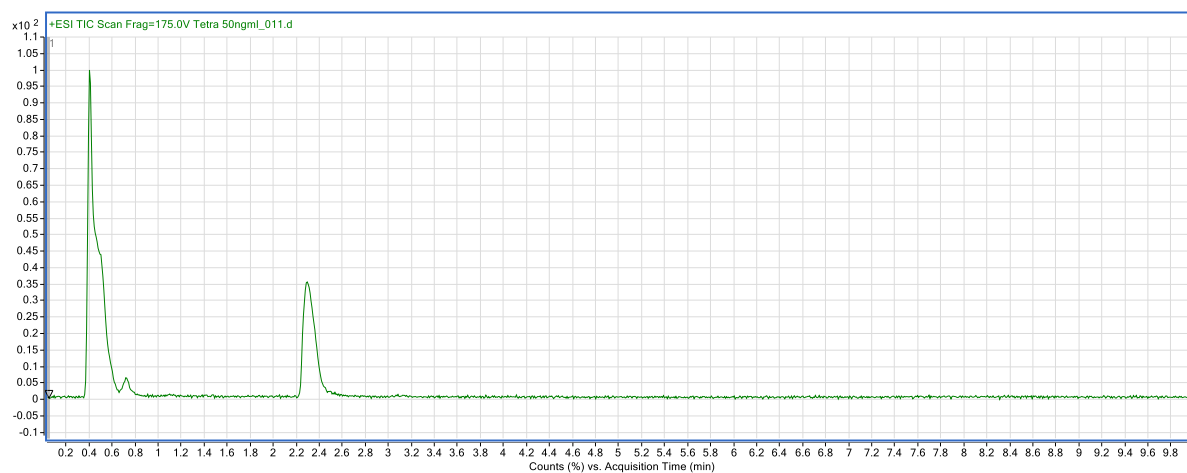

Figure S9 Tetracaine (MS scan).

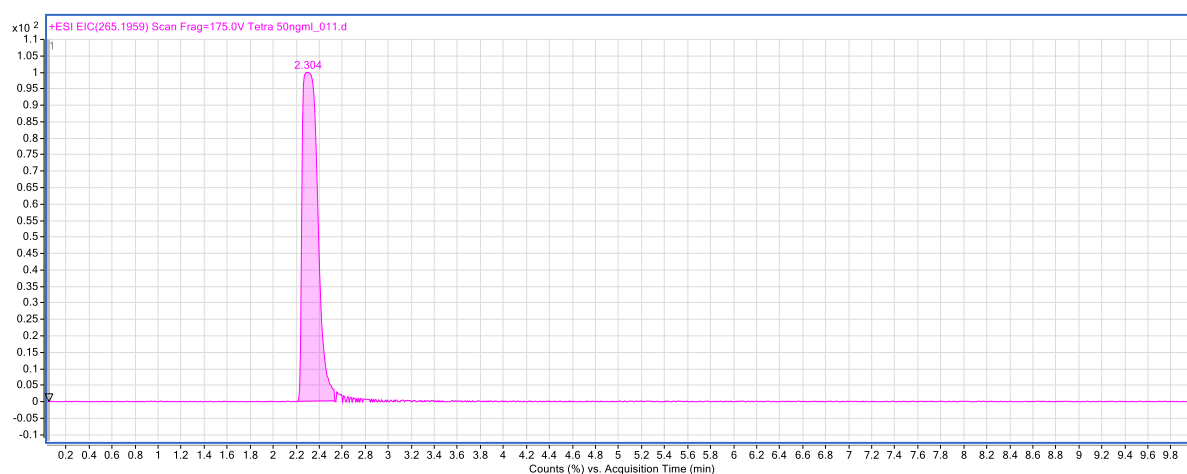

Figure S10 Tetracaine (MS scan, extracted ion 265.1959  $m/z$ ).

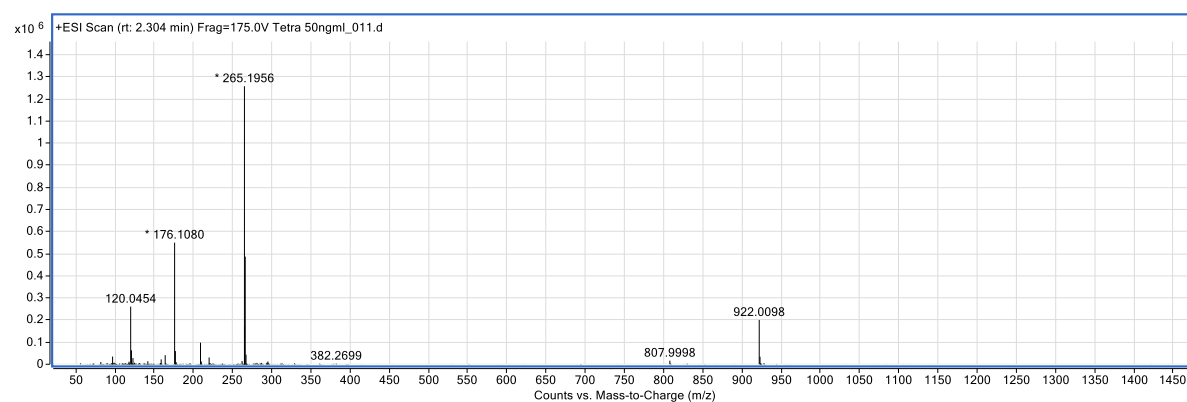

Figure S11 Tetracaine (MS scan, extracted ion 265.1959  $m/z$ , asterisk mean saturated detector).

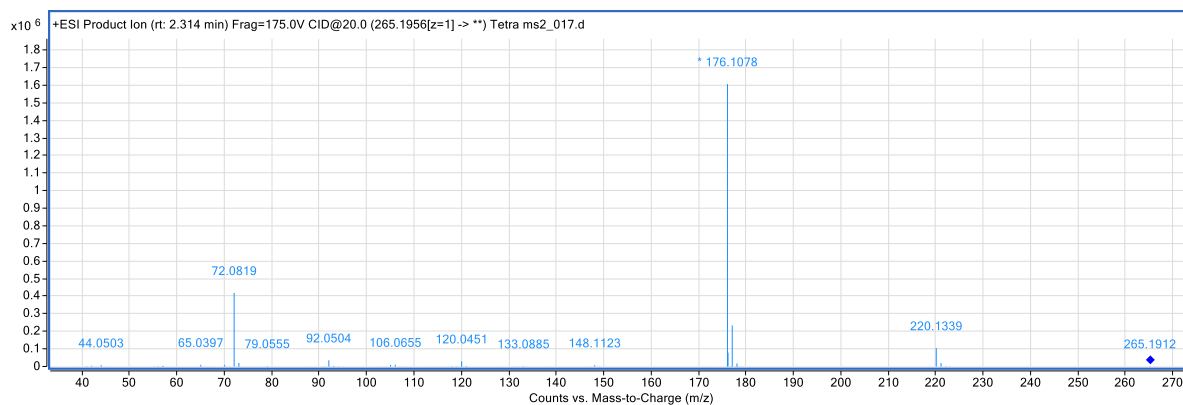

Figure S12 Tetracaine (MSMS scan, product ions from  $m/z$  265.1959, CID 20.0 V) after release experiment.

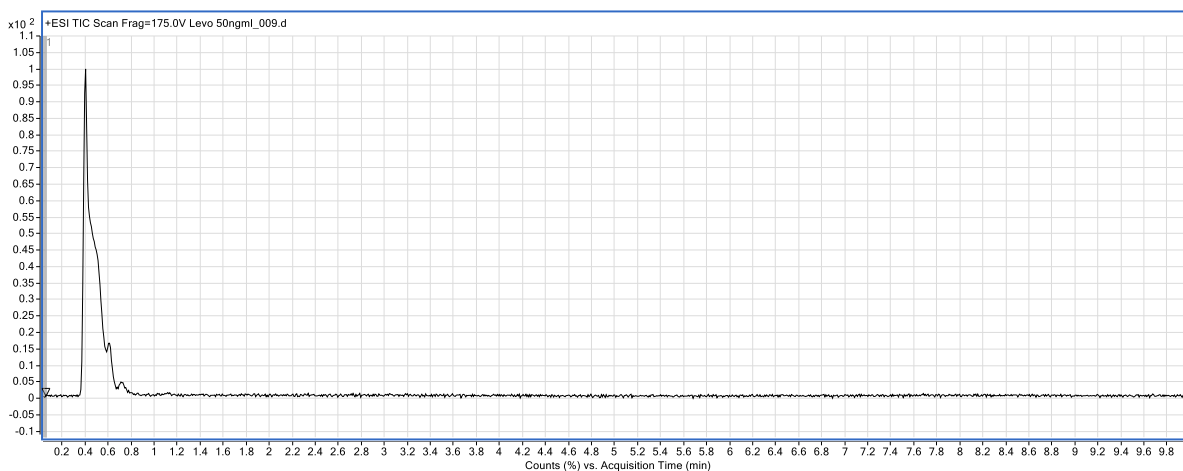

Figure S13 Levofloxacin (MS scan).

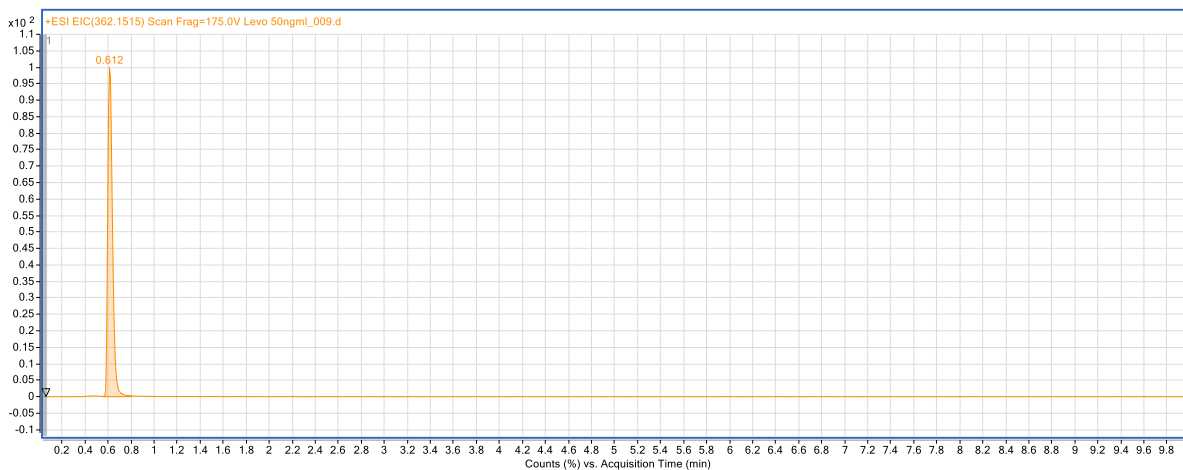

Figure S14 Levofloxacin (MS scan, extracted ion 362.1515  $m/z$ ).

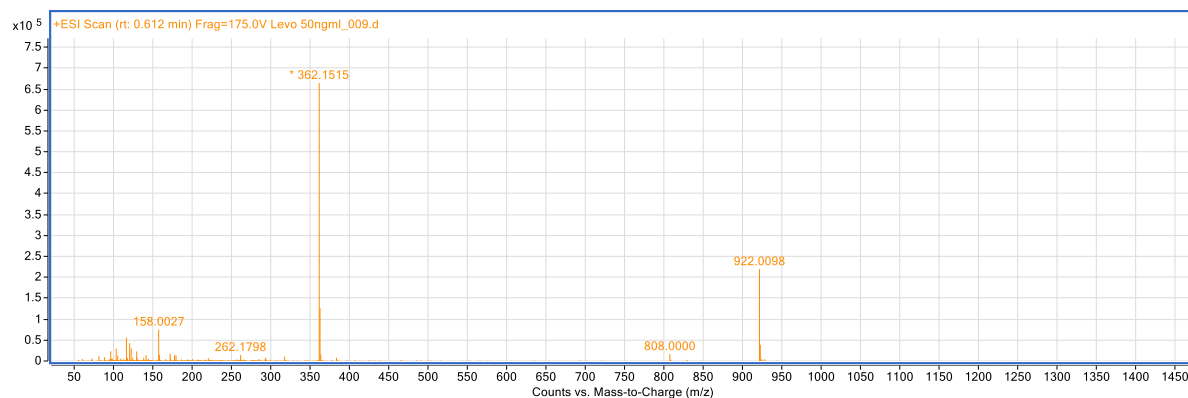

Figure S15 Levofloxacin (MS scan, extracted ion 362.1515 m/z, asterisk mean saturated detector).

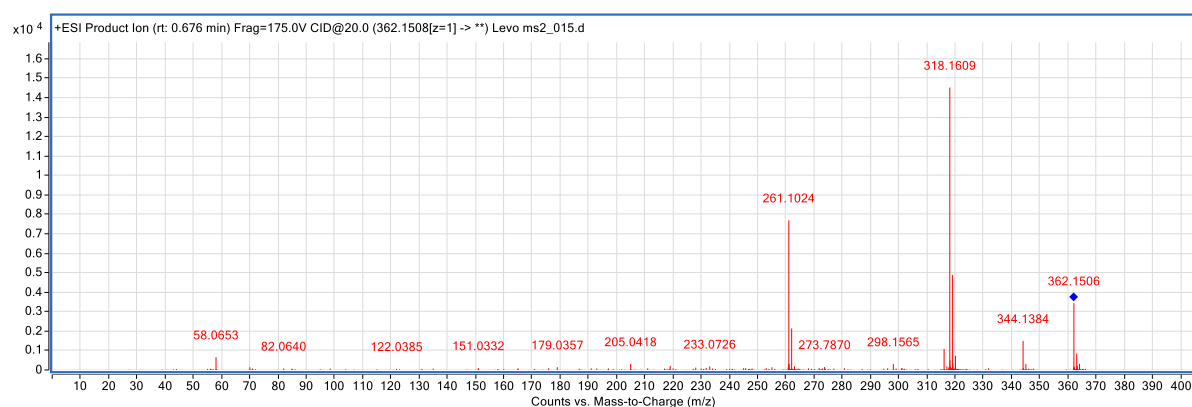

Figure S16 Levofloxacin (MSMS scan, product ions from m/z 362.1516, CID 20.0 V) after release experiment.
